# Supplementary material for: DeepAMR for predicting co-occurrent resistance of Mycobacterium tuberculosis
Source: Oxford University Press journal article supplement (doi:10.1093/bioinformatics/btz067), 2019-01-24
Supplement: bioinformatics_35_18_3240_s4.zip [file bioinformatics_35_18_3240_s4.zip]

## Supplement A

Table 1: Overview of phenotypes of isolates with respect to ant-TB drugs. (Tot. denotes total number of isolates. Sus. and Res. stand for the number of susceptible and resistant isolates, respectively, whose percentages are shown within the parentheses correspondingly. Untested means the number of isolates that were not tested against the drug.

| DRUG | Sus. (%)    | Res. (%)   | Tot.  |
|------|-------------|------------|-------|
| EMB  | 10829 (87%) | 1558 (13%) | 12387 |
| RIF  | 9597 (78%)  | 2737 (22%) | 12334 |
| INH  | 8080 (70%)  | 3393 (30%) | 11473 |
| PZA  | 9267 (90%)  | 1147 (10%) | 11414 |
| SM   | 5105 (75%)  | 1729 (25%) | 6834  |
| OFX  | 2618 (85%)  | 458 (15%)  | 3076  |
| CAP  | 2741 (90%)  | 315 (10%)  | 3056  |
| AK   | 2690 (92%)  | 273 (8%)   | 2963  |
| KAN  | 1925 (89%)  | 242 (11%)  | 2167  |
| MOX  | 1249 (83%)  | 262 (17%)  | 1511  |
| CIP  | 529 (87%)   | 77 (13%)   | 606   |

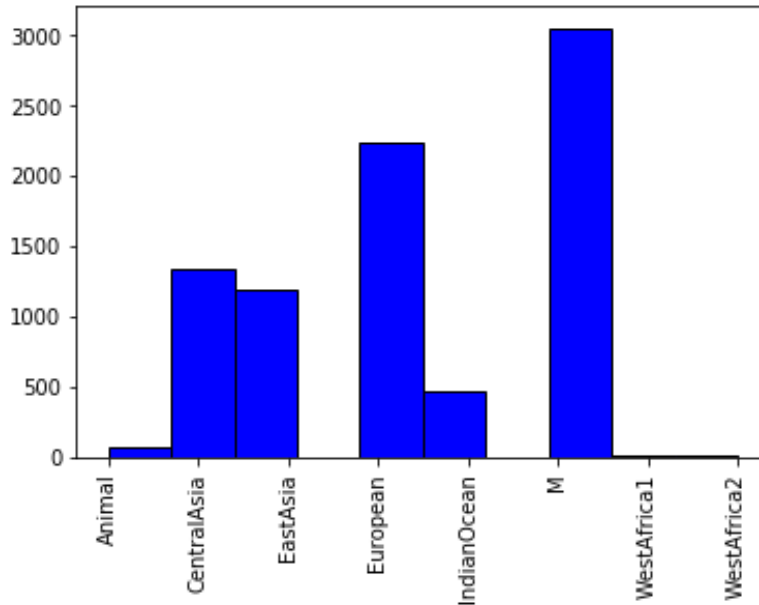

Figure 1: Lineage distribution of the dataset. “M” stands for missing values.

## Supplement B

Table 2: Resistance co-occurrence summary for pair-wise drugs of the total 11 tested anti-TB drugs.

|     | INH | RIF  | EMB  | PZA | SM   | CIP | MOX | OFX | AK  | KAN | CAP |
|-----|-----|------|------|-----|------|-----|-----|-----|-----|-----|-----|
| INH | 552 | 2465 | 1410 | 988 | 1539 | 59  | 244 | 366 | 224 | 165 | 259 |
| RIF | 0   | 112  | 1446 | 930 | 1335 | 48  | 241 | 438 | 259 | 222 | 288 |
| EMB | 0   | 0    | 16   | 659 | 905  | 32  | 155 | 308 | 204 | 159 | 227 |
| PZA | 0   | 0    | 0    | 124 | 603  | 17  | 126 | 165 | 122 | 89  | 134 |
| SM  | 0   | 0    | 0    | 0   | 115  | 9   | 130 | 228 | 171 | 83  | 202 |
| CIP | 0   | 0    | 0    | 0   | 0    | 2   | 23  | 22  | 1   | 2   | 1   |
| MOX | 0   | 0    | 0    | 0   | 0    | 0   | 2   | 225 | 61  | 55  | 63  |
| OFX | 0   | 0    | 0    | 0   | 0    | 0   | 0   | 1   | 117 | 132 | 133 |
| AK  | 0   | 0    | 0    | 0   | 0    | 0   | 0   | 0   | 1   | 125 | 213 |
| KAN | 0   | 0    | 0    | 0   | 0    | 0   | 0   | 0   | 0   | 9   | 129 |
| CAP | 0   | 0    | 0    | 0   | 0    | 0   | 0   | 0   | 0   | 0   | 7   |

Table 3: Phi coefficients between first-line anti-TB drugs.

|     | INH  | EMB  | RIF  | PZA  |
|-----|------|------|------|------|
| INH | 1    | 0.59 | 0.76 | 0.48 |
| EMB | 0.59 | 1    | 0.69 | 0.55 |
| RIF | 0.76 | 0.69 | 1    | 0.55 |
| PZA | 0.48 | 0.55 | 0.55 | 1    |

## Supplement C

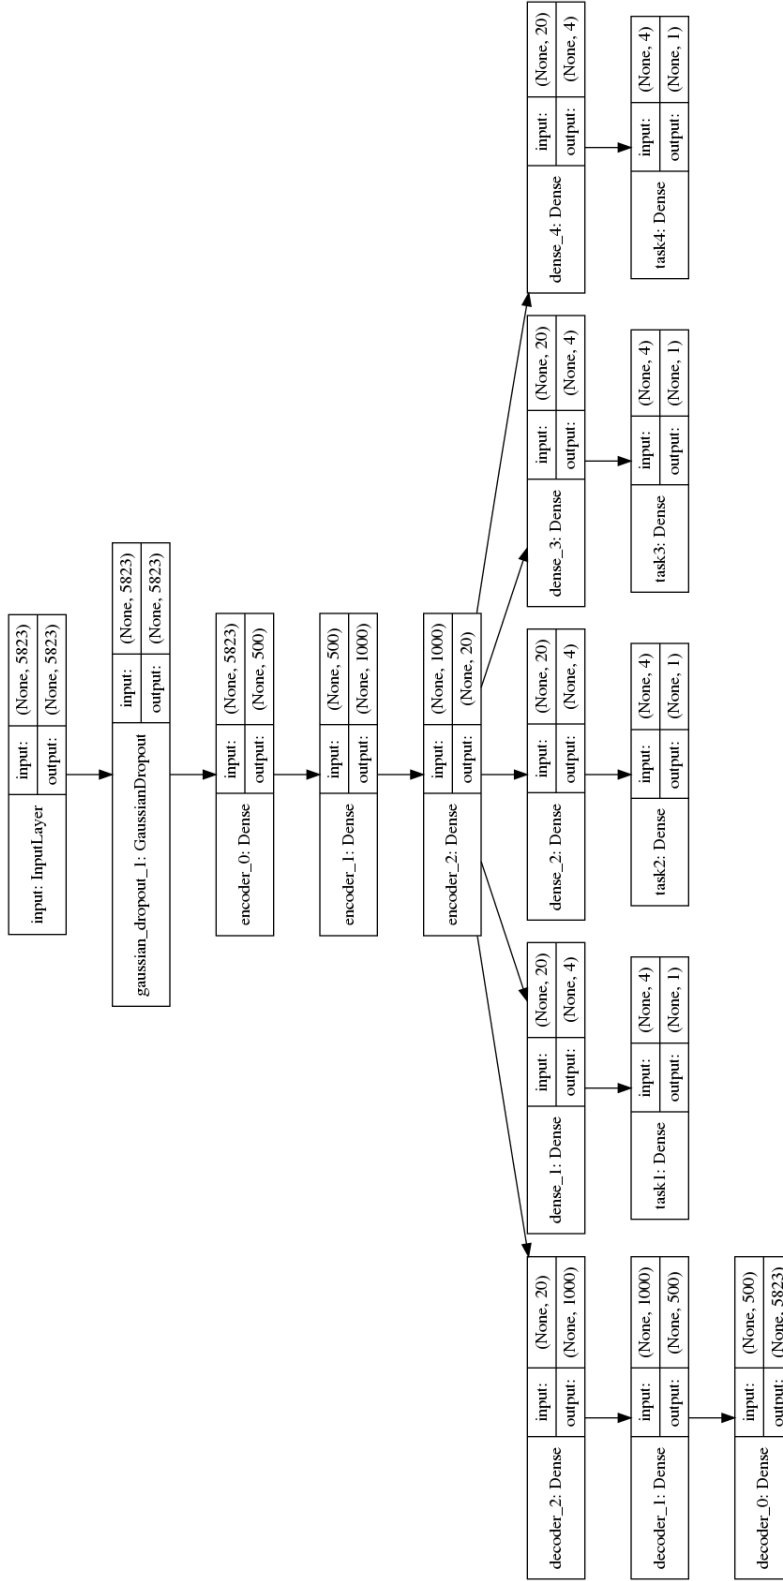

Figure 2: Architecture of deepAMR, where a deep denoising auto-encoder is augmented by multi-task classifiers at the most inner layer of the auto-encoder.

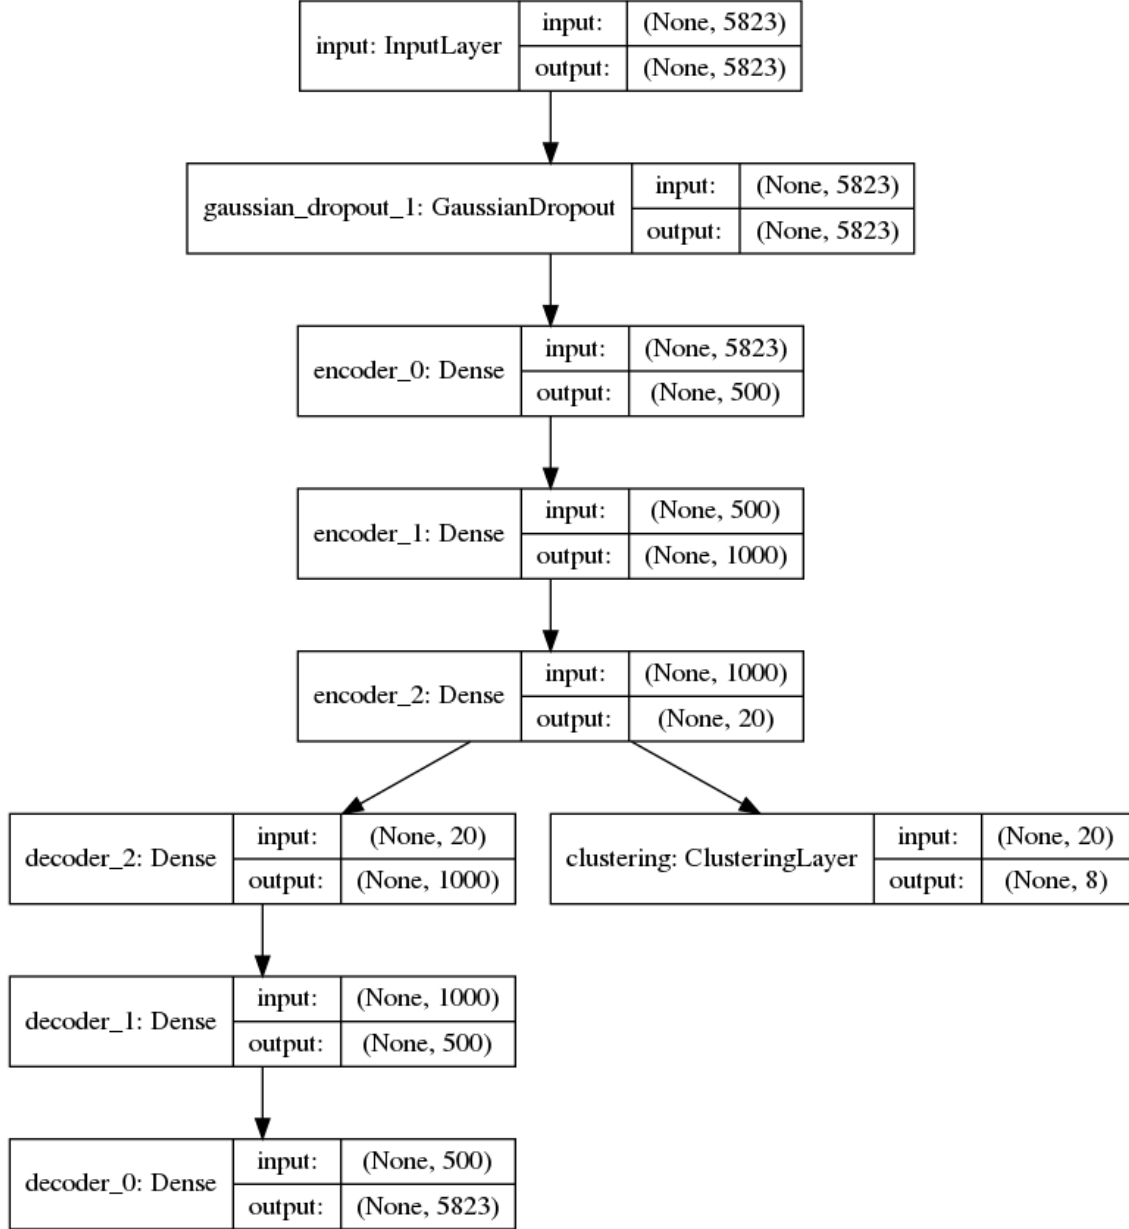

Figure 3: Architecture of deepAMR\_cluster, a variant of deepAMR, where a deep denoising auto-encoder is augmented by a clustering layer at the most inner layer of the auto-encoder. The clustering layer is initialised by K-means clustering.

## Supplement D

Table 4: Comparison between models on F2 feature sets.

| Drugs | Models | SVM         | RF          | MLKNN       | ECC         | DeepAMR     |
|-------|--------|-------------|-------------|-------------|-------------|-------------|
|       |        |             |             |             |             |             |
| INH   | Sen    | 72.2        | 72.7        | 58.8        | 65.7        | <b>77.0</b> |
|       | Spec   | 95.8        | 96.3        | 91.8        | <b>98.4</b> | 87.5        |
|       | AUROC  | 86.5        | <b>87.1</b> | 77.0        | 82.1        | 87.0        |
|       | F1     | 79.3        | <b>80.1</b> | 65.9        | 77.5        | 74.4        |
| EMB   | Sen    | 82.8        | 80.4        | 64.7        | 73.9        | <b>85.3</b> |
|       | Spec   | 92.4        | 93.1        | <b>95.3</b> | 94.7        | 92.2        |
|       | AUROC  | 89.7        | 91.7        | 84.6        | 84.9        | <b>92.5</b> |
|       | F1     | 70.9        | 71.1        | 65.9        | 70.8        | <b>71.8</b> |
| RIF   | Sen    | 80.1        | 78.0        | 58.1        | 74.3        | <b>80.4</b> |
|       | Spec   | 96.7        | 96.2        | 91.6        | <b>96.8</b> | 91.5        |
|       | AUROC  | <b>90.9</b> | 90.4        | 80.3        | 86.4        | 90.7        |
|       | F1     | <b>83.4</b> | 81.3        | 61.5        | 80.0        | 76.1        |
| PZA   | Sen    | 81.0        | 75.6        | 34.9        | 72.5        | <b>82.7</b> |
|       | Spec   | 92.1        | 94.9        | <b>97.5</b> | 94.0        | 89.6        |
|       | AUROC  | 89.1        | 88.3        | 81.2        | 84.3        | <b>89.6</b> |
|       | F1     | 67.5        | <b>70.8</b> | 45.5        | 66.8        | 63.5        |
| MDR   | Sen    | 81.1        | 79.9        | 64.8        | 75.8        | <b>82.8</b> |
|       | Spec   | 94.3        | 94.2        | <b>95.5</b> | 94.8        | 91.1        |
|       | AUROC  | 87.7        | 87.0        | 80.1        | 85.3        | <b>91.7</b> |
|       | F1     | 73.7        | 72.8        | 66.2        | 71.6        | <b>76.0</b> |
| PANS  | Sen    | <b>78.9</b> | 74.9        | 59.8        | 63.7        | 76.0        |
|       | Spec   | 93.7        | 95.5        | 88.9        | <b>98.5</b> | 87.5        |
|       | AUROC  | 86.3        | 85.2        | 74.4        | 81.1        | <b>86.4</b> |
|       | F1     | <b>82.1</b> | 81.3        | 65.4        | 76.3        | 75.2        |

## Supplement E

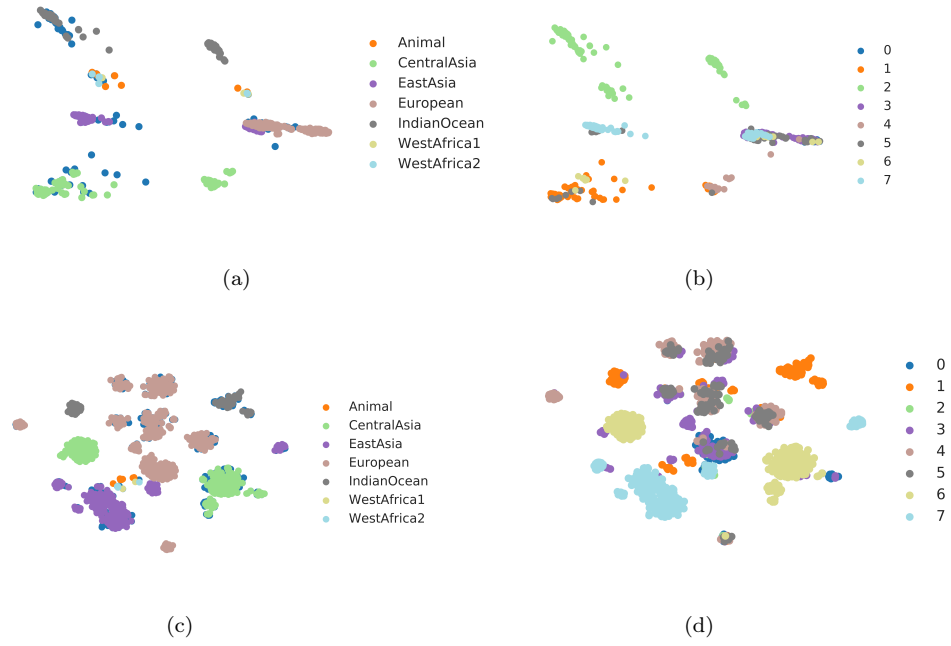

Figure 4: Visualization for the original input: a) lineage distribution using PCA; b) predicted clusters using PCA; c) lineage distribution using t-SNE; d) predicted clusters using t-SNE.

Supplement F

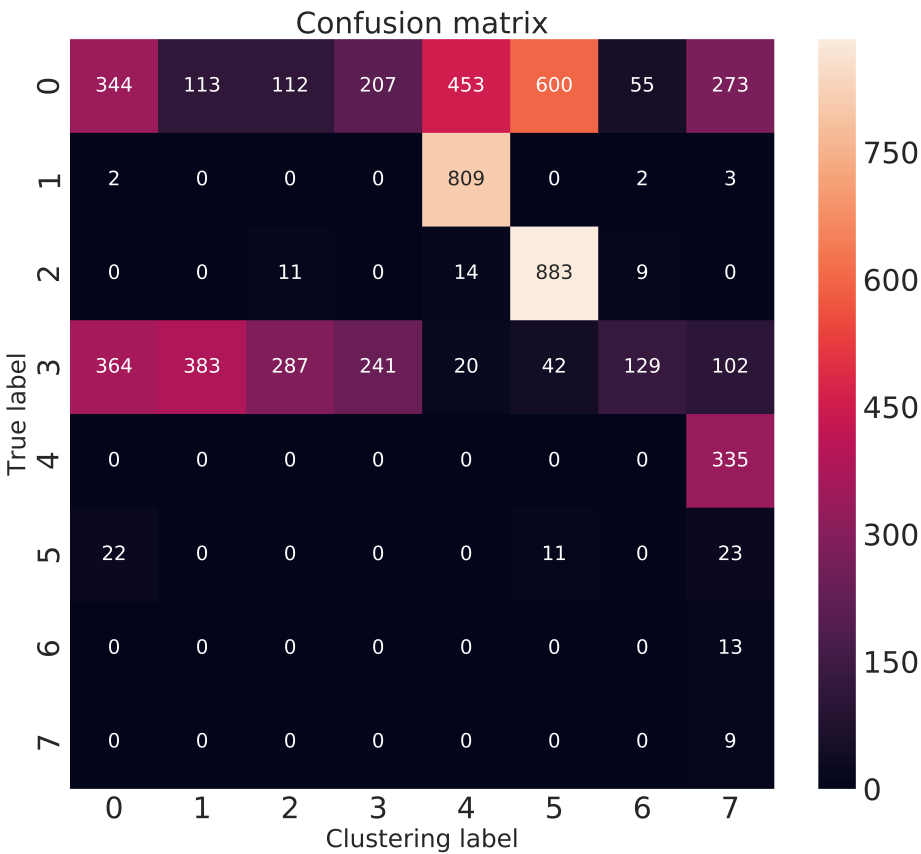

Figure 5: Heatmap of confusion matrix obtained by clustering.

## Supplement H

Table 5: Hyperparameters tuning for examined machine learning methods.

| Methods         | Hyperparameter grid                                                                                                                                                        | Implementation    | Internal CV |
|-----------------|----------------------------------------------------------------------------------------------------------------------------------------------------------------------------|-------------------|-------------|
| SVM             | Linear Kernel, regularisation param: C=[0.001, 0.01,0.1,1,100]                                                                                                             | scikit-learn      | Yes         |
| RF              | N_estimators=[10,20,30],<br>max_features=[auto,sqrt,log2],<br>min_samples_split=[2,4,8], Boot-<br>strap=[True, False]                                                      | scikit-learn      | Yes         |
| MLKNN           | Number of neighbours: k=[1,3,5],<br>smoothing param: s=[0.5, 0.7, 1.0]                                                                                                     | scikit-multilearn | Yes         |
| ECC             | Base learner=logisticRegrassion,<br>n_chains=20, order=random                                                                                                              | scikit-learn      | No          |
| DeepAMR         | batch size=64, ker-<br>nel_initializer=uniform,<br>drop_rate=0.3, deep-<br>AMR_optimizer=Nadam, learn-<br>ing rate=CLR(triangle2)[1],<br>ae_optimizer=SGD                  | Keras             | No          |
| DeepAMR_cluster | batch size=64, ker-<br>nel_initializer=uniform,<br>drop_rate=0.3, cluster_initializer=K-<br>means, N_cluster=8,<br>ae_learning rate=CLR(triangle2)<br>[1],ae_optimizer=SGD | Keras             | No          |

Note: Internal CV means that the internal cross validation grid search is conducted in every experiment across over hyperparameter grid; ae is short for auto-encoder. All models were implemented by Python 3.6. Package requirements: numpy, pandas, tensorflow, keras, scipy, matplotlib, sklearn, seaborn, iterstrat, clr\_callback

## References

- [1] Smith, Leslie N. *Cyclical learning rates for training neural networks*. Applications of Computer Vision (WACV), 2017 IEEE Winter Conference on, 464–472, 2017.



## Supplement I

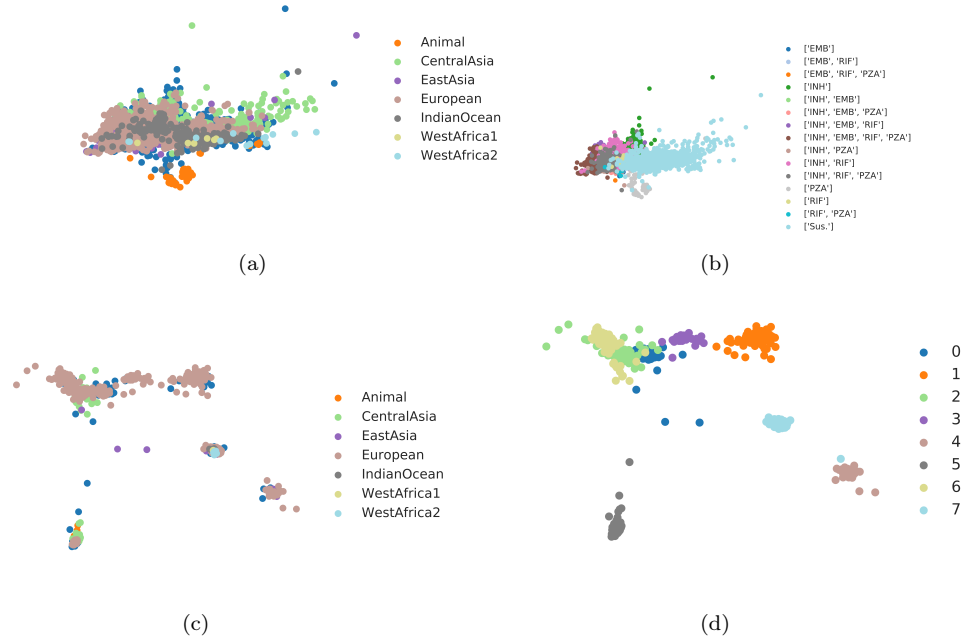

Figure 6: Visualization obtained by PCA: a) lineage distribution in latent space learned by DeepAMR; b) phenotype distribution in latent space learned by DeepAMR; c) lineage distribution in latent space learned by DeepAMR\_cluster; d) predicted clusters in latent space learned by DeepAMR\_cluster.
